# Supplementary material for: Structure-based design of human pancreatic amylase inhibitors from the natural anthocyanin database for type 2 diabetes
Source: Royal Society of Chemistry journal article supplement (doi:10.1039/c9fo02885d), 2020-01-01
Supplement: c9fo02885d3.pdf [file c9fo02885d3.pdf]

## Supplementary Information

### 1 Supplementary Tables

Table S1 Virtual Screening Results

Table S2 Calculated Secondary Structure Fractions

### 2 Supplementary Figures

Figure S1 Ranking of virtual screening results

Figure S2 Predicted interactions of Pg3R and M3A with HPA in molecular docking

Figure S3 Enzyme kinetic results of 15 anthocyanins in Lineweaver-Burk plots

Figure S4 Molecular docking results of M3Ga with HPA

Figure S5 Molecular docking results of M3G with HPA

Figure S6 Molecular docking results of C3A with HPA

Figure S7 Molecular docking results of D3A with HPA

Figure S8 Molecular docking results of Pt3A with HPA

Figure S9 Molecular docking results of Pn3A with HPA

Figure S10 RMSD and conformation analysis of molecular dynamic results

### 3 Supplementary Movies

Movie 1 Conformation analysis of HPA and M3A complex

Movie 2 Interaction analysis of M3A with HPA

## 1 Supplementary Tables

Table S1

### Virtual Screening Results

| Ranking | Chem ID   | Code  | Predicted Binding Energy |
|---------|-----------|-------|--------------------------|
| 1       | 443917    | Pg5   | -13.6                    |
| 2       | 12137511  | M6    | -12.6                    |
| 3       | 44256862  | Pn38  | -10.5                    |
| 4       | 131751177 | C222  | -10.3                    |
| 5       | 90658134  | C174  | -10.2                    |
| 6       | 44256911  | D69   | -10.2                    |
| 7       | 44256966  | Pt16  | -10.2                    |
| 8       | 5282068   | C15   | -10.1                    |
| 9       | 44256762  | C84   | -10.1                    |
| 10      | 102515358 | C208  | -10.1                    |
| 11      | 441702    | D5    | -10.1                    |
| 12      | 44256878  | D45   | -10.1                    |
| 13      | 44256932  | D90   | -10.1                    |
| 14      | 44256849  | Pn26  | -10.1                    |
| 15      | 23724730  | C34   | -10.0                    |
| 16      | 44256771  | C92   | -10.0                    |
| 17      | 23724706  | D27   | -10.0                    |
| 18      | 90657578  | Pg95  | -10.0                    |
| 19      | 102515095 | Pg112 | -10.0                    |
| 20      | 102515504 | Pg116 | -10.0                    |
| 21      | 44256855  | Pn31  | -10.0                    |
| 22      | 131752297 | Pn54  | -10.0                    |
| 23      | 44256763  | C85   | -9.9                     |
| 24      | 44256765  | C87   | -9.9                     |
| 25      | 44256823  | C141  | -9.9                     |
| 26      | 70698351  | C155  | -9.9                     |
| 27      | 132526878 | C248  | -9.9                     |
| 28      | 6444318   | D11   | -9.9                     |
| 29      | 23724707  | D28   | -9.9                     |
| 30      | 44256943  | D94   | -9.9                     |
| 31      | 44256946  | D97   | -9.9                     |
| 32      | 101699074 | D127  | -9.9                     |
| 33      | 46878535  | Pg88  | -9.9                     |
| 34      | 102174360 | Pg111 | -9.9                     |
| 35      | 44256850  | Pn27  | -9.9                     |
| 36      | 44256860  | Pn36  | -9.9                     |
| 37      | 101945205 | Pn49  | -9.9                     |
| 38      | 11239215  | M5    | -9.9                     |

|    |           |      |      |
|----|-----------|------|------|
| 39 | 5282067   | C14  | -9.8 |
| 40 | 21576546  | C31  | -9.8 |
| 41 | 44256711  | C47  | -9.8 |
| 42 | 44256744  | C69  | -9.8 |
| 43 | 44256769  | C90  | -9.8 |
| 44 | 44256819  | C137 | -9.8 |
| 45 | 131750824 | C219 | -9.8 |
| 46 | 5320022   | D9   | -9.8 |
| 47 | 23724731  | D29  | -9.8 |
| 48 | 44256665  | Pg54 | -9.8 |
| 49 | 44256681  | Pg69 | -9.8 |
| 50 | 44256687  | Pg75 | -9.8 |
| 51 | 44256692  | Pg80 | -9.8 |
| 52 | 45266708  | Pg87 | -9.8 |
| 53 | 44256851  | Pn28 | -9.8 |
| 54 | 72193654  | Pn44 | -9.8 |
| 55 | 44256967  | Pt17 | -9.8 |
| 56 | 72193655  | Pt28 | -9.8 |
| 57 | 72193651  | M47  | -9.8 |
| 58 | 101332736 | M52  | -9.8 |
| 59 | 23724699  | C33  | -9.7 |
| 60 | 44256728  | C57  | -9.7 |
| 61 | 44256759  | C82  | -9.7 |
| 62 | 44256800  | C119 | -9.7 |
| 63 | 101268575 | C182 | -9.7 |
| 64 | 102163929 | C199 | -9.7 |
| 65 | 131752266 | C230 | -9.7 |
| 66 | 44256949  | D100 | -9.7 |
| 67 | 71308288  | D105 | -9.7 |
| 68 | 72193639  | D106 | -9.7 |
| 69 | 44256628  | Pg26 | -9.7 |
| 70 | 90658862  | Pg97 | -9.7 |
| 71 | 44256745  | C70  | -9.6 |
| 72 | 44256752  | C75  | -9.6 |
| 73 | 44256820  | C138 | -9.6 |
| 74 | 131752260 | C226 | -9.6 |
| 75 | 44256872  | D39  | -9.6 |
| 76 | 44256874  | D41  | -9.6 |
| 77 | 44256905  | D66  | -9.6 |
| 78 | 44256910  | D68  | -9.6 |
| 79 | 44256920  | D78  | -9.6 |
| 80 | 44256928  | D86  | -9.6 |
| 81 | 44256930  | D88  | -9.6 |
| 82 | 131750957 | D133 | -9.6 |
| 83 | 44256680  | Pg68 | -9.6 |
| 84 | 21594268  | Pn10 | -9.6 |
| 85 | 44256846  | Pn23 | -9.6 |
| 86 | 72193653  | Pn43 | -9.6 |
| 87 | 6540681   | Pt3  | -9.6 |

|     |           |       |      |
|-----|-----------|-------|------|
| 88  | 44256965  | Pt15  | -9.6 |
| 89  | 118797967 | M55   | -9.6 |
| 90  | 44256705  | C41   | -9.5 |
| 91  | 44256707  | C43   | -9.5 |
| 92  | 44256712  | C48   | -9.5 |
| 93  | 44256746  | C71   | -9.5 |
| 94  | 44256766  | C88   | -9.5 |
| 95  | 131753191 | C244  | -9.5 |
| 96  | 132526875 | C246  | -9.5 |
| 97  | 23250609  | D23   | -9.5 |
| 98  | 44256893  | D56   | -9.5 |
| 99  | 44256917  | D75   | -9.5 |
| 100 | 44256927  | D85   | -9.5 |
| 101 | 44256931  | D89   | -9.5 |
| 102 | 90658852  | D122  | -9.5 |
| 103 | 23724733  | Pg12  | -9.5 |
| 104 | 23724700  | Pn11  | -9.5 |
| 105 | 44256975  | Pt25  | -9.5 |
| 106 | 101204175 | Pt33  | -9.5 |
| 107 | 131752300 | Pt37  | -9.5 |
| 108 | 23724702  | M7    | -9.5 |
| 109 | 44256991  | M20   | -9.5 |
| 110 | 443921    | C12   | -9.4 |
| 111 | 44256764  | C86   | -9.4 |
| 112 | 44256794  | C113  | -9.4 |
| 113 | 44256818  | C136  | -9.4 |
| 114 | 44256821  | C139  | -9.4 |
| 115 | 44256824  | C142  | -9.4 |
| 116 | 50909830  | C152  | -9.4 |
| 117 | 71587512  | C160  | -9.4 |
| 118 | 102385315 | C202  | -9.4 |
| 119 | 25244498  | D34   | -9.4 |
| 120 | 44256879  | D46   | -9.4 |
| 121 | 44256881  | D48   | -9.4 |
| 122 | 44256904  | D65   | -9.4 |
| 123 | 72734296  | D107  | -9.4 |
| 124 | 443919    | Pg6   | -9.4 |
| 125 | 44256636  | Pg33  | -9.4 |
| 126 | 44256638  | Pg35  | -9.4 |
| 127 | 44256653  | Pg47  | -9.4 |
| 128 | 44256688  | Pg76  | -9.4 |
| 129 | 102515242 | Pg113 | -9.4 |
| 130 | 131753202 | Pn55  | -9.4 |
| 131 | 44256963  | Pt13  | -9.4 |
| 132 | 44256976  | Pt26  | -9.4 |
| 133 | 100926551 | Pt31  | -9.4 |
| 134 | 101513454 | Pt34  | -9.4 |
| 135 | 44257004  | M30   | -9.4 |
| 136 | 44257013  | M39   | -9.4 |

|     |           |      |      |
|-----|-----------|------|------|
| 137 | 74977114  | M48  | -9.4 |
| 138 | 100926552 | D125 | -9.4 |
| 139 | 44256702  | C38  | -9.3 |
| 140 | 44256747  | C72  | -9.3 |
| 141 | 44256753  | C76  | -9.3 |
| 142 | 44256774  | C95  | -9.3 |
| 143 | 74976921  | C164 | -9.3 |
| 144 | 101545480 | C185 | -9.3 |
| 145 | 101545483 | C188 | -9.3 |
| 146 | 101575201 | C190 | -9.3 |
| 147 | 102515449 | C210 | -9.3 |
| 148 | 131752265 | C229 | -9.3 |
| 149 | 131753047 | C237 | -9.3 |
| 150 | 10100905  | D12  | -9.3 |
| 151 | 11972331  | D17  | -9.3 |
| 152 | 44256916  | D74  | -9.3 |
| 153 | 90657963  | D116 | -9.3 |
| 154 | 44256616  | Pg17 | -9.3 |
| 155 | 44256627  | Pg25 | -9.3 |
| 156 | 44256640  | Pg36 | -9.3 |
| 157 | 44256667  | Pg56 | -9.3 |
| 158 | 44256676  | Pg64 | -9.3 |
| 159 | 44256678  | Pg66 | -9.3 |
| 160 | 44256856  | Pn32 | -9.3 |
| 161 | 44256958  | Pt9  | -9.3 |
| 162 | 44256964  | Pt14 | -9.3 |
| 163 | 44256970  | Pt20 | -9.3 |
| 164 | 72193656  | Pt29 | -9.3 |
| 165 | 44256989  | M19  | -9.3 |
| 166 | 44257000  | M26  | -9.3 |
| 167 | 44257007  | M33  | -9.3 |
| 168 | 44257014  | M40  | -9.3 |
| 169 | 131752271 | M56  | -9.3 |
| 170 | 44256756  | C79  | -9.3 |
| 171 | 90659011  | C176 | -9.2 |
| 172 | 29232     | C1   | -9.2 |
| 173 | 5316221   | C16  | -9.2 |
| 174 | 14655733  | C25  | -9.2 |
| 175 | 44256729  | C58  | -9.2 |
| 176 | 44256734  | C61  | -9.2 |
| 177 | 44256802  | C121 | -9.2 |
| 178 | 44256804  | C123 | -9.2 |
| 179 | 44256806  | C125 | -9.2 |
| 180 | 44256826  | C144 | -9.2 |
| 181 | 44256830  | C148 | -9.2 |
| 182 | 73981555  | C162 | -9.2 |
| 183 | 74976932  | C165 | -9.2 |
| 184 | 132470936 | C245 | -9.2 |
| 185 | 132526876 | C247 | -9.2 |

|     |           |       |      |
|-----|-----------|-------|------|
| 186 | 15922818  | D22   | -9.2 |
| 187 | 25244733  | D35   | -9.2 |
| 188 | 44256882  | D49   | -9.2 |
| 189 | 44256890  | D53   | -9.2 |
| 190 | 44256898  | D60   | -9.2 |
| 191 | 44256902  | D64   | -9.2 |
| 192 | 44256919  | D77   | -9.2 |
| 193 | 44256921  | D79   | -9.2 |
| 194 | 102028681 | D128  | -9.2 |
| 195 | 131752146 | D134  | -9.2 |
| 196 | 44256632  | Pg29  | -9.2 |
| 197 | 44256637  | Pg34  | -9.2 |
| 198 | 44256652  | Pg46  | -9.2 |
| 199 | 44256682  | Pg70  | -9.2 |
| 200 | 101731795 | Pg108 | -9.2 |
| 201 | 44256836  | Pn14  | -9.2 |
| 202 | 44256960  | Pt10  | -9.2 |
| 203 | 134732297 | Pt40  | -9.2 |
| 204 | 44256981  | M11   | -9.2 |
| 205 | 44257006  | M32   | -9.2 |
| 206 | 44257010  | M36   | -9.2 |
| 207 | 72193647  | M46   | -9.2 |
| 208 | 132531494 | M57   | -9.2 |
| 209 | 9897848   | Pt4   | -9.2 |
| 210 | 4481457   | C13   | -9.1 |
| 211 | 6602295   | C18   | -9.1 |
| 212 | 44256717  | C50   | -9.1 |
| 213 | 44256730  | C59   | -9.1 |
| 214 | 44256775  | C96   | -9.1 |
| 215 | 44256784  | C104  | -9.1 |
| 216 | 44256787  | C107  | -9.1 |
| 217 | 44256831  | C149  | -9.1 |
| 218 | 56776253  | C154  | -9.1 |
| 219 | 101545484 | C189  | -9.1 |
| 220 | 131752762 | C232  | -9.1 |
| 221 | 5316496   | D7    | -9.1 |
| 222 | 25201660  | D33   | -9.1 |
| 223 | 44256889  | D52   | -9.1 |
| 224 | 44256892  | D55   | -9.1 |
| 225 | 44256895  | D57   | -9.1 |
| 226 | 44256922  | D80   | -9.1 |
| 227 | 167643    | Pg2   | -9.1 |
| 228 | 23724704  | Pg11  | -9.1 |
| 229 | 44256615  | Pg16  | -9.1 |
| 230 | 44256618  | Pg19  | -9.1 |
| 231 | 44256629  | Pg27  | -9.1 |
| 232 | 44256663  | Pg52  | -9.1 |
| 233 | 44256664  | Pg53  | -9.1 |
| 234 | 44256675  | Pg63  | -9.1 |

|     |           |       |      |
|-----|-----------|-------|------|
| 235 | 44256679  | Pg67  | -9.1 |
| 236 | 44256689  | Pg77  | -9.1 |
| 237 | 44256691  | Pg79  | -9.1 |
| 238 | 101545485 | Pg101 | -9.1 |
| 239 | 101682297 | Pg107 | -9.1 |
| 240 | 131751360 | Pg118 | -9.1 |
| 241 | 5488811   | Pn3   | -9.1 |
| 242 | 44256843  | Pn20  | -9.1 |
| 243 | 44256995  | M23   | -9.1 |
| 244 | 25203612  | C36   | -9.0 |
| 245 | 441681    | C7    | -9.0 |
| 246 | 44256701  | C37   | -9.0 |
| 247 | 44256737  | C63   | -9.0 |
| 248 | 44256772  | C93   | -9.0 |
| 249 | 44256814  | C132  | -9.0 |
| 250 | 101268577 | C184  | -9.0 |
| 251 | 131752264 | C228  | -9.0 |
| 252 | 131753044 | C234  | -9.0 |
| 253 | 131753049 | C239  | -9.0 |
| 254 | 131753050 | C240  | -9.0 |
| 255 | 131753090 | C243  | -9.0 |
| 256 | 5493095   | D10   | -9.0 |
| 257 | 11972332  | D18   | -9.0 |
| 258 | 14311158  | D20   | -9.0 |
| 259 | 23724705  | D26   | -9.0 |
| 260 | 44256899  | D61   | -9.0 |
| 261 | 44256908  | D67   | -9.0 |
| 262 | 44256912  | D70   | -9.0 |
| 263 | 44256929  | D87   | -9.0 |
| 264 | 44256933  | D91   | -9.0 |
| 265 | 44256947  | D98   | -9.0 |
| 266 | 90657987  | D117  | -9.0 |
| 267 | 90658465  | D121  | -9.0 |
| 268 | 44256624  | Pg23  | -9.0 |
| 269 | 44256642  | Pg38  | -9.0 |
| 270 | 44256644  | Pg40  | -9.0 |
| 271 | 44256649  | Pg43  | -9.0 |
| 272 | 90659020  | Pg98  | -9.0 |
| 273 | 14757905  | Pn8   | -9.0 |
| 274 | 44256842  | Pn19  | -9.0 |
| 275 | 44256844  | Pn21  | -9.0 |
| 276 | 44256859  | Pn35  | -9.0 |
| 277 | 44256865  | Pn41  | -9.0 |
| 278 | 75184857  | Pt30  | -9.0 |
| 279 | 44256985  | M15   | -9.0 |
| 280 | 44256988  | M18   | -9.0 |
| 281 | 71308234  | M44   | -9.0 |
| 282 | 181258    | C3    | -8.9 |
| 283 | 441688    | C8    | -8.9 |

|     |           |       |      |
|-----|-----------|-------|------|
| 284 | 10312147  | C21   | -8.9 |
| 285 | 15714477  | C29   | -8.9 |
| 286 | 44256709  | C45   | -8.9 |
| 287 | 44256726  | C55   | -8.9 |
| 288 | 44256742  | C67   | -8.9 |
| 289 | 44256757  | C80   | -8.9 |
| 290 | 44256758  | C81   | -8.9 |
| 291 | 44256782  | C102  | -8.9 |
| 292 | 44256786  | C106  | -8.9 |
| 293 | 44256810  | C129  | -8.9 |
| 294 | 56671053  | C153  | -8.9 |
| 295 | 74976920  | C163  | -8.9 |
| 296 | 74976937  | C167  | -8.9 |
| 297 | 101114060 | C181  | -8.9 |
| 298 | 101697180 | C194  | -8.9 |
| 299 | 101921444 | C197  | -8.9 |
| 300 | 131751173 | C221  | -8.9 |
| 301 | 3083066   | D6    | -8.9 |
| 302 | 90657596  | D115  | -8.9 |
| 303 | 25195385  | Pg13  | -8.9 |
| 304 | 44256614  | Pg15  | -8.9 |
| 305 | 44256641  | Pg37  | -8.9 |
| 306 | 44256651  | Pg45  | -8.9 |
| 307 | 44256660  | Pg49  | -8.9 |
| 308 | 44256683  | Pg71  | -8.9 |
| 309 | 44256686  | Pg74  | -8.9 |
| 310 | 44256690  | Pg78  | -8.9 |
| 311 | 101545491 | Pg104 | -8.9 |
| 312 | 101860769 | Pg109 | -8.9 |
| 313 | 101931855 | Pg110 | -8.9 |
| 314 | 131751760 | Pg120 | -8.9 |
| 315 | 131751762 | Pg122 | -8.9 |
| 316 | 44256847  | Pn24  | -8.9 |
| 317 | 44256861  | Pn37  | -8.9 |
| 318 | 131752296 | Pn53  | -8.9 |
| 319 | 102174359 | Pt36  | -8.9 |
| 320 | 44256980  | M10   | -8.9 |
| 321 | 44256983  | M13   | -8.9 |
| 322 | 44257002  | M28   | -8.9 |
| 323 | 101701148 | M54   | -8.9 |
| 324 | 11169452  | C22   | -8.9 |
| 325 | 6602304   | C19   | -8.8 |
| 326 | 44256706  | C42   | -8.8 |
| 327 | 44256714  | C49   | -8.8 |
| 328 | 44256721  | C51   | -8.8 |
| 329 | 44256768  | C89   | -8.8 |
| 330 | 44256770  | C91   | -8.8 |
| 331 | 44256781  | C101  | -8.8 |
| 332 | 102385316 | C203  | -8.8 |



|     |           |       |      |
|-----|-----------|-------|------|
| 333 | 102515296 | C207  | -8.8 |
| 334 | 122396785 | C213  | -8.8 |
| 335 | 131750819 | C215  | -8.8 |
| 336 | 131752267 | C231  | -8.8 |
| 337 | 192918    | D3    | -8.8 |
| 338 | 23724698  | D24   | -8.8 |
| 339 | 44256880  | D47   | -8.8 |
| 340 | 44256883  | D50   | -8.8 |
| 341 | 44256897  | D59   | -8.8 |
| 342 | 44256918  | D76   | -8.8 |
| 343 | 44256926  | D84   | -8.8 |
| 344 | 44256950  | D101  | -8.8 |
| 345 | 44256951  | D102  | -8.8 |
| 346 | 74977047  | D112  | -8.8 |
| 347 | 101243495 | D126  | -8.8 |
| 348 | 102515146 | D129  | -8.8 |
| 349 | 21603999  | Pg9   | -8.8 |
| 350 | 44256650  | Pg44  | -8.8 |
| 351 | 44256685  | Pg73  | -8.8 |
| 352 | 44256698  | Pg85  | -8.8 |
| 353 | 44256699  | Pg86  | -8.8 |
| 354 | 102515511 | Pg117 | -8.8 |
| 355 | 185595    | Pn1   | -8.8 |
| 356 | 44256841  | Pn18  | -8.8 |
| 357 | 44256853  | Pn29  | -8.8 |
| 358 | 44256864  | Pn40  | -8.8 |
| 359 | 44256955  | Pt6   | -8.8 |
| 360 | 44256961  | Pt11  | -8.8 |
| 361 | 131752301 | Pt38  | -8.8 |
| 362 | 44256979  | M9    | -8.8 |
| 363 | 44256982  | M12   | -8.8 |
| 364 | 44256994  | M22   | -8.8 |
| 365 | 44257005  | M31   | -8.8 |
| 366 | 44257012  | M38   | -8.8 |
| 367 | 44256891  | D54   | -8.8 |
| 368 | 15126294  | C27   | -8.7 |
| 369 | 23724697  | C32   | -8.7 |
| 370 | 23724737  | C35   | -8.7 |
| 371 | 44256708  | C44   | -8.7 |
| 372 | 44256722  | C52   | -8.7 |
| 373 | 44256773  | C94   | -8.7 |
| 374 | 44256783  | C103  | -8.7 |
| 375 | 44256795  | C114  | -8.7 |
| 376 | 44256797  | C116  | -8.7 |
| 377 | 44256817  | C135  | -8.7 |
| 378 | 44256832  | C150  | -8.7 |
| 379 | 44256833  | C151  | -8.7 |
| 380 | 101545481 | C186  | -8.7 |
| 381 | 131750823 | C218  | -8.7 |

|     |           |       |      |
|-----|-----------|-------|------|
| 382 | 131750956 | C220  | -8.7 |
| 383 | 131753043 | C233  | -8.7 |
| 384 | 131753089 | C242  | -8.7 |
| 385 | 11972329  | D16   | -8.7 |
| 386 | 15385440  | D21   | -8.7 |
| 387 | 25200736  | D31   | -8.7 |
| 388 | 44256884  | D51   | -8.7 |
| 389 | 44256896  | D58   | -8.7 |
| 390 | 44256925  | D83   | -8.7 |
| 391 | 44256948  | D99   | -8.7 |
| 392 | 44256622  | Pg21  | -8.7 |
| 393 | 44256625  | Pg24  | -8.7 |
| 394 | 44256630  | Pg28  | -8.7 |
| 395 | 44256634  | Pg31  | -8.7 |
| 396 | 44256670  | Pg59  | -8.7 |
| 397 | 44256673  | Pg61  | -8.7 |
| 398 | 44256674  | Pg62  | -8.7 |
| 399 | 44256677  | Pg65  | -8.7 |
| 400 | 44256684  | Pg72  | -8.7 |
| 401 | 44256693  | Pg81  | -8.7 |
| 402 | 44256697  | Pg84  | -8.7 |
| 403 | 101545489 | Pg103 | -8.7 |
| 404 | 101545495 | Pg106 | -8.7 |
| 405 | 131751479 | Pg119 | -8.7 |
| 406 | 44256839  | Pn16  | -8.7 |
| 407 | 44256857  | Pn33  | -8.7 |
| 408 | 74977015  | Pn46  | -8.7 |
| 409 | 100958662 | Pn47  | -8.7 |
| 410 | 44256956  | Pt7   | -8.7 |
| 411 | 44256973  | Pt23  | -8.7 |
| 412 | 71587075  | Pt27  | -8.7 |
| 413 | 100987512 | Pt32  | -8.7 |
| 414 | 44256710  | C46   | -8.6 |
| 415 | 44256731  | C60   | -8.6 |
| 416 | 44256739  | C64   | -8.6 |
| 417 | 44256816  | C134  | -8.6 |
| 418 | 44256825  | C143  | -8.6 |
| 419 | 74976933  | C166  | -8.6 |
| 420 | 76322875  | C169  | -8.6 |
| 421 | 102438708 | C204  | -8.6 |
| 422 | 102588654 | C212  | -8.6 |
| 423 | 131753045 | C235  | -8.6 |
| 424 | 131753051 | C241  | -8.6 |
| 425 | 441689    | D4    | -8.6 |
| 426 | 25200961  | D32   | -8.6 |
| 427 | 44256868  | D37   | -8.6 |
| 428 | 44256873  | D40   | -8.6 |
| 429 | 44256924  | D82   | -8.6 |
| 430 | 44256941  | D92   | -8.6 |

|     |           |      |      |
|-----|-----------|------|------|
| 431 | 73774601  | D109 | -8.6 |
| 432 | 44256617  | Pg18 | -8.6 |
| 433 | 44256633  | Pg30 | -8.6 |
| 434 | 44256659  | Pg48 | -8.6 |
| 435 | 44256668  | Pg57 | -8.6 |
| 436 | 74315894  | Pn45 | -8.6 |
| 437 | 101268578 | Pn48 | -8.6 |
| 438 | 131752295 | Pn52 | -8.6 |
| 439 | 44256971  | Pt21 | -8.6 |
| 440 | 101922116 | Pt35 | -8.6 |
| 441 | 443652    | M2   | -8.6 |
| 442 | 44256986  | M16  | -8.6 |
| 443 | 44256997  | M24  | -8.6 |
| 444 | 44257003  | M29  | -8.6 |
| 445 | 12137508  | D19  | -8.6 |
| 446 | 182463    | C4   | -8.5 |
| 447 | 441671    | C6   | -8.5 |
| 448 | 10143380  | C20  | -8.5 |
| 449 | 44256724  | C54  | -8.5 |
| 450 | 44256736  | C62  | -8.5 |
| 451 | 44256761  | C83  | -8.5 |
| 452 | 44256811  | C130 | -8.5 |
| 453 | 44256815  | C133 | -8.5 |
| 454 | 71296189  | C156 | -8.5 |
| 455 | 71296190  | C157 | -8.5 |
| 456 | 101666798 | C191 | -8.5 |
| 457 | 101692563 | C193 | -8.5 |
| 458 | 101710212 | C195 | -8.5 |
| 459 | 102227471 | C200 | -8.5 |
| 460 | 44256900  | D62  | -8.5 |
| 461 | 86289400  | D113 | -8.5 |
| 462 | 90658013  | D119 | -8.5 |
| 463 | 90659258  | D124 | -8.5 |
| 464 | 44256623  | Pg22 | -8.5 |
| 465 | 44256648  | Pg42 | -8.5 |
| 466 | 44256669  | Pg58 | -8.5 |
| 467 | 44256696  | Pg83 | -8.5 |
| 468 | 72734294  | Pg91 | -8.5 |
| 469 | 90657500  | Pg94 | -8.5 |
| 470 | 44256835  | Pn13 | -8.5 |
| 471 | 44256858  | Pn34 | -8.5 |
| 472 | 44256863  | Pn39 | -8.5 |
| 473 | 72193652  | Pn42 | -8.5 |
| 474 | 122706400 | Pn50 | -8.5 |
| 475 | 443651    | Pt1  | -8.5 |
| 476 | 132569542 | Pt39 | -8.5 |
| 477 | 441765    | M1   | -8.5 |
| 478 | 44256984  | M14  | -8.5 |
| 479 | 44257016  | M42  | -8.5 |

|     |           |       |      |
|-----|-----------|-------|------|
| 480 | 5319251   | M4    | -8.5 |
| 481 | 185664    | C5    | -8.5 |
| 482 | 5491619   | C17   | -8.4 |
| 483 | 14779570  | C26   | -8.4 |
| 484 | 15719498  | C30   | -8.4 |
| 485 | 44256777  | C98   | -8.4 |
| 486 | 44256785  | C105  | -8.4 |
| 487 | 44256799  | C118  | -8.4 |
| 488 | 71315020  | C158  | -8.4 |
| 489 | 87984599  | C170  | -8.4 |
| 490 | 101805622 | C196  | -8.4 |
| 491 | 102445481 | C205  | -8.4 |
| 492 | 23724703  | D25   | -8.4 |
| 493 | 44256923  | D81   | -8.4 |
| 494 | 74977043  | D111  | -8.4 |
| 495 | 90658074  | D120  | -8.4 |
| 496 | 102515301 | D131  | -8.4 |
| 497 | 44256661  | Pg50  | -8.4 |
| 498 | 54602214  | Pg89  | -8.4 |
| 499 | 71627264  | Pg90  | -8.4 |
| 500 | 101257894 | Pg100 | -8.4 |
| 501 | 44256834  | Pn12  | -8.4 |
| 502 | 44256840  | Pn17  | -8.4 |
| 503 | 44256845  | Pn22  | -8.4 |
| 504 | 44256854  | Pn30  | -8.4 |
| 505 | 131753204 | Pn57  | -8.4 |
| 506 | 44256987  | M17   | -8.4 |
| 507 | 44256999  | M25   | -8.4 |
| 508 | 44257011  | M37   | -8.4 |
| 509 | 44257017  | M43   | -8.4 |
| 510 | 100926553 | M51   | -8.4 |
| 511 | 12137509  | C24   | -8.4 |
| 512 | 44256703  | C39   | -8.3 |
| 513 | 44256741  | C66   | -8.3 |
| 514 | 44256743  | C68   | -8.3 |
| 515 | 44256755  | C78   | -8.3 |
| 516 | 44256776  | C97   | -8.3 |
| 517 | 44256796  | C115  | -8.3 |
| 518 | 44256829  | C147  | -8.3 |
| 519 | 72812405  | C161  | -8.3 |
| 520 | 126455742 | C214  | -8.3 |
| 521 | 131750821 | C216  | -8.3 |
| 522 | 131751484 | C223  | -8.3 |
| 523 | 44256866  | D36   | -8.3 |
| 524 | 44256875  | D42   | -8.3 |
| 525 | 44256914  | D72   | -8.3 |
| 526 | 44256944  | D95   | -8.3 |
| 527 | 44256945  | D96   | -8.3 |
| 528 | 44256635  | Pg32  | -8.3 |

|     |           |       |      |
|-----|-----------|-------|------|
| 529 | 44256643  | Pg39  | -8.3 |
| 530 | 44256645  | Pg41  | -8.3 |
| 531 | 74976917  | Pg93  | -8.3 |
| 532 | 90659377  | Pg99  | -8.3 |
| 533 | 102515381 | Pg115 | -8.3 |
| 534 | 443654    | Pn2   | -8.3 |
| 535 | 14861214  | Pn9   | -8.3 |
| 536 | 44256838  | Pn15  | -8.3 |
| 537 | 6325802   | Pt2   | -8.3 |
| 538 | 44256968  | Pt18  | -8.3 |
| 539 | 44256974  | Pt24  | -8.3 |
| 540 | 44257008  | M34   | -8.3 |
| 541 | 44256727  | C56   | -8.2 |
| 542 | 44256740  | C65   | -8.2 |
| 543 | 44256754  | C77   | -8.2 |
| 544 | 44256813  | C131  | -8.2 |
| 545 | 100917934 | C180  | -8.2 |
| 546 | 102025500 | C198  | -8.2 |
| 547 | 131750822 | C217  | -8.2 |
| 548 | 131751767 | C225  | -8.2 |
| 549 | 165558    | D1    | -8.2 |
| 550 | 176440    | D2    | -8.2 |
| 551 | 44256870  | D38   | -8.2 |
| 552 | 73157738  | D108  | -8.2 |
| 553 | 90659256  | D123  | -8.2 |
| 554 | 443648    | Pg3   | -8.2 |
| 555 | 5320457   | Pg8   | -8.2 |
| 556 | 44256662  | Pg51  | -8.2 |
| 557 | 44256666  | Pg55  | -8.2 |
| 558 | 44256694  | Pg82  | -8.2 |
| 559 | 90658189  | Pg96  | -8.2 |
| 560 | 101545493 | Pg105 | -8.2 |
| 561 | 102515300 | Pg114 | -8.2 |
| 562 | 131751761 | Pg121 | -8.2 |
| 563 | 13832989  | Pn6   | -8.2 |
| 564 | 131752294 | Pn51  | -8.2 |
| 565 | 131753203 | Pn56  | -8.2 |
| 566 | 44256972  | Pt22  | -8.2 |
| 567 | 44256977  | M8    | -8.2 |
| 568 | 44256992  | M21   | -8.2 |
| 569 | 44257009  | M35   | -8.2 |
| 570 | 74977116  | M49   | -8.2 |
| 571 | 44256723  | C53   | -8.1 |
| 572 | 44256779  | C100  | -8.1 |
| 573 | 44256792  | C112  | -8.1 |
| 574 | 44256798  | C117  | -8.1 |
| 575 | 44256803  | C122  | -8.1 |
| 576 | 71315022  | C159  | -8.1 |
| 577 | 101268576 | C183  | -8.1 |

|     |           |      |      |
|-----|-----------|------|------|
| 578 | 102318121 | C201 | -8.1 |
| 579 | 102514964 | C206 | -8.1 |
| 580 | 131753046 | C236 | -8.1 |
| 581 | 131753048 | C238 | -8.1 |
| 582 | 44256901  | D63  | -8.1 |
| 583 | 44256913  | D71  | -8.1 |
| 584 | 44256942  | D93  | -8.1 |
| 585 | 74818467  | D110 | -8.1 |
| 586 | 11454027  | Pn4  | -8.1 |
| 587 | 44256848  | Pn25 | -8.1 |
| 588 | 131753205 | Pn58 | -8.1 |
| 589 | 44256962  | Pt12 | -8.1 |
| 590 | 176458    | C2   | -8.0 |
| 591 | 441699    | C9   | -8.0 |
| 592 | 44256704  | C40  | -8.0 |
| 593 | 44256748  | C73  | -8.0 |
| 594 | 44256788  | C108 | -8.0 |
| 595 | 44256789  | C109 | -8.0 |
| 596 | 44256807  | C126 | -8.0 |
| 597 | 74976939  | C168 | -8.0 |
| 598 | 131752261 | C227 | -8.0 |
| 599 | 102515282 | D130 | -8.0 |
| 600 | 44256613  | Pg14 | -8.0 |
| 601 | 12137510  | Pn5  | -8.0 |
| 602 | 14311169  | Pn7  | -8.0 |
| 603 | 3568969   | M3   | -8.0 |
| 604 | 101697438 | M53  | -8.0 |
| 605 | 443915    | C11  | -7.9 |
| 606 | 44256778  | C99  | -7.9 |
| 607 | 44256828  | C146 | -7.9 |
| 608 | 90659301  | C179 | -7.9 |
| 609 | 44256915  | D73  | -7.9 |
| 610 | 44256619  | Pg20 | -7.9 |
| 611 | 74976872  | Pg92 | -7.9 |
| 612 | 14311149  | Pt5  | -7.9 |
| 613 | 44256969  | Pt19 | -7.9 |
| 614 | 44257001  | M27  | -7.9 |
| 615 | 72193646  | M45  | -7.9 |
| 616 | 74977121  | M50  | -7.9 |
| 617 | 44256827  | C145 | -7.8 |
| 618 | 131751485 | C224 | -7.8 |
| 619 | 44256877  | D44  | -7.8 |
| 620 | 132575728 | M58  | -7.8 |
| 621 | 44256790  | C110 | -7.7 |
| 622 | 44256801  | C120 | -7.7 |
| 623 | 44256809  | C128 | -7.7 |
| 624 | 101545482 | C187 | -7.7 |
| 625 | 10843319  | D15  | -7.7 |
| 626 | 44256952  | D103 | -7.7 |

|     |           |       |      |
|-----|-----------|-------|------|
| 627 | 23724696  | Pg10  | -7.7 |
| 628 | 44256671  | Pg60  | -7.7 |
| 629 | 443623    | C10   | -7.6 |
| 630 | 90657364  | D114  | -7.6 |
| 631 | 131852234 | D135  | -7.6 |
| 632 | 443913    | Pg4   | -7.6 |
| 633 | 44257015  | M41   | -7.6 |
| 634 | 11953846  | C23   | -7.6 |
| 635 | 44256805  | C124  | -7.5 |
| 636 | 44256876  | D43   | -7.5 |
| 637 | 167642    | Pg1   | -7.5 |
| 638 | 5282162   | Pg7   | -7.5 |
| 639 | 101545487 | Pg102 | -7.5 |
| 640 | 131751763 | Pg123 | -7.5 |
| 641 | 101682300 | C192  | -7.4 |
| 642 | 44256791  | C111  | -7.3 |
| 643 | 54605857  | D104  | -7.3 |
| 644 | 5316498   | D8    | -7.2 |
| 645 | 15433396  | C28   | -7.1 |
| 646 | 134775899 | D136  | -7.1 |
| 647 | 90658006  | D118  | -7.0 |
| 648 | 44256808  | C127  | -6.9 |
| 649 | 44256957  | Pt8   | -6.8 |
| 650 | 10100906  | D13   | -6.6 |
| 651 | 10196837  | D14   | -6.6 |
| 652 | 102515359 | D132  | -6.6 |
| 653 | 90657732  | C172  | -6.6 |
| 654 | 90659093  | C177  | -6.5 |
| 655 | 134742266 | C249  | -6.5 |
| 656 | 44256749  | C74   | -6.4 |
| 657 | 24187921  | D30   | -6.2 |
| 658 | 134755516 | C250  | -6.1 |
| 659 | 44256822  | C140  | -5.8 |
| 660 | 90658034  | C173  | -5.6 |
| 661 | 102515400 | C209  | -5.4 |
| 662 | 90658522  | C175  | -5.4 |
| 663 | 90659261  | C178  | -5.3 |
| 664 | 90657144  | C171  | -5.0 |
| 665 | 102515473 | C211  | -4.7 |

---

**Table 2 Summary of 3D-QSAR model statistics**

|                              | <b>naïve alignment</b> | <b>docking alignment</b> |
|------------------------------|------------------------|--------------------------|
| <b>no. of components</b>     | 7                      | 5                        |
| <b>r<sup>2</sup></b>         | 0.999                  | 0.989                    |
| <b>std error of estimate</b> | 0.032                  | 0.074                    |
| <b>F value</b>               | 669.9                  | 138.8                    |



**Table S3****Calculated Secondary Structure Fractions**

| <b>M3A<br/>(<math>\mu\text{M}</math>)</b> | <b>0</b> | <b>50</b> | <b>100</b> | <b>M3G<br/>(<math>\mu\text{M}</math>)</b> | <b>0</b> | <b>100</b> | <b>200</b> | <b>Pt3A<br/>(<math>\mu\text{M}</math>)</b> | <b>0</b> | <b>250</b> | <b>500</b> | <b>Pn3A<br/>(<math>\mu\text{M}</math>)</b> | <b>0</b> | <b>50</b> | <b>100</b> |
|-------------------------------------------|----------|-----------|------------|-------------------------------------------|----------|------------|------------|--------------------------------------------|----------|------------|------------|--------------------------------------------|----------|-----------|------------|
| <b><math>\alpha</math>-helix</b>          | 0.24     | 0.17      | 0.14       |                                           | 0.24     | 0.34       | 0.34       |                                            | 0.34     | 0.23       | 0.24       |                                            | 0.20     | 0.21      | 0.24       |
| <b><math>\beta</math>-sheet</b>           | 0.17     | 0.26      | 0.29       |                                           | 0.09     | 0.00       | 0.00       |                                            | 0.00     | 0.12       | 0.11       |                                            | 0.16     | 0.16      | 0.11       |
| <b>Turn</b>                               | 0.20     | 0.24      | 0.22       |                                           | 0.22     | 0.09       | 0.10       |                                            | 0.10     | 0.21       | 0.21       |                                            | 0.22     | 0.25      | 0.22       |
| <b>Random</b>                             | 0.36     | 0.29      | 0.34       |                                           | 0.44     | 0.58       | 0.58       |                                            | 0.52     | 0.40       | 0.42       |                                            | 0.37     | 0.36      | 0.40       |
| <b>Total</b>                              | 0.97     | 0.96      | 0.99       |                                           | 0.99     | 1.01       | 1.02       |                                            | 0.96     | 0.96       | 0.98       |                                            | 0.95     | 0.98      | 0.97       |

## 2 Supplementary Figures

Figure S1

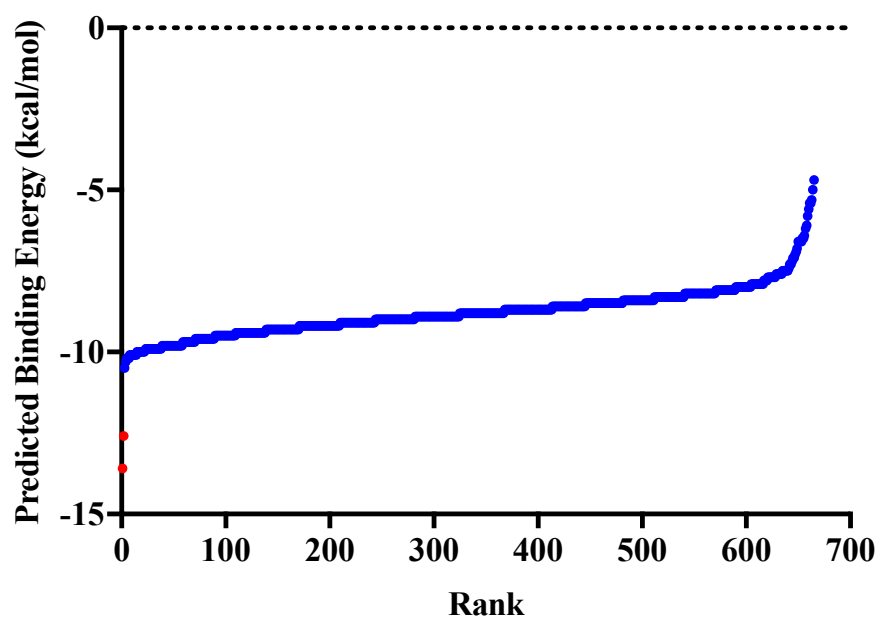

Ranking of virtual screening results. Red points indicate the top 2 ranked anthocyanins.

Figure S2

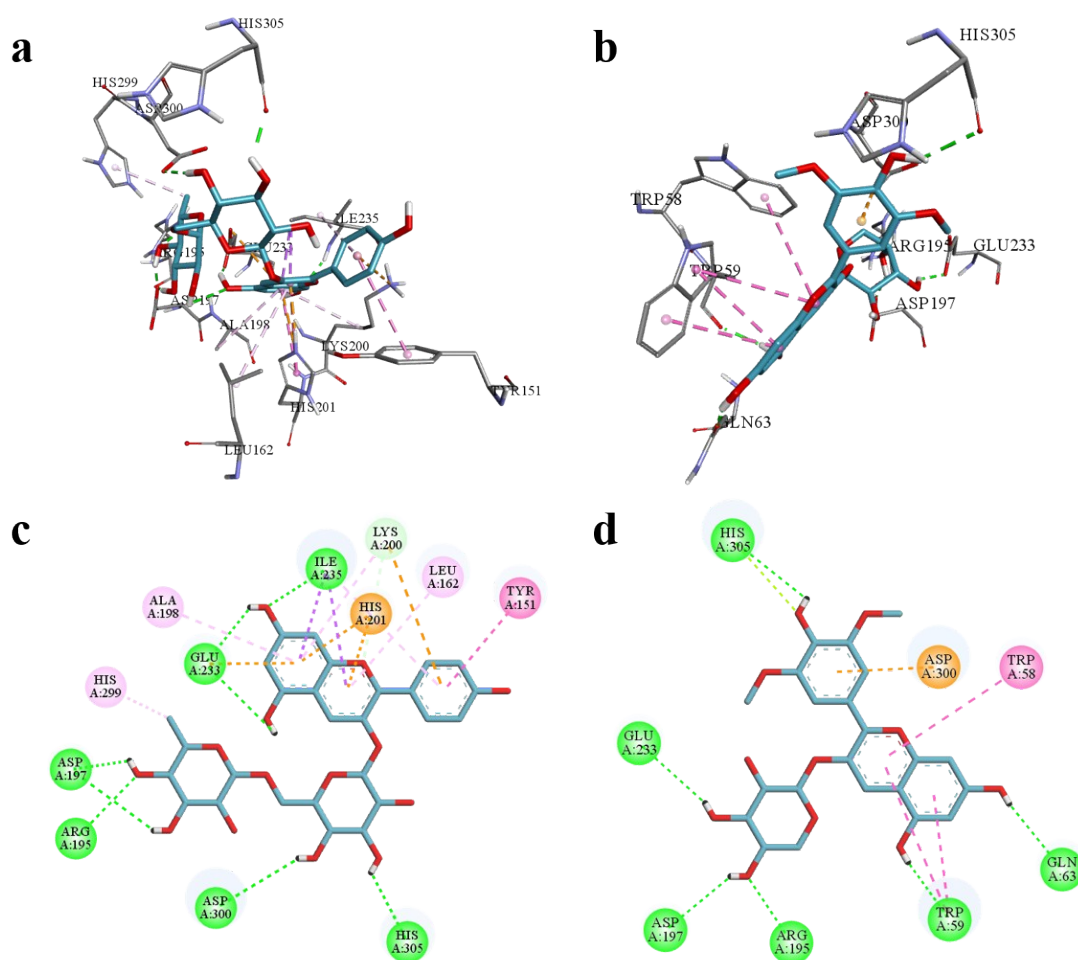

Predicted interactions of Pg3R and M3A with HPA in molecular docking. Pg3R and M3A are colored in cyan, and their oxygen atoms are colored in red. Hydrogen bonding interactions are colored in green, hydrophobic interactions are colored in orange, light pink and pink. a. Predicted interactions of Pg3R with HPA. b. Predicted interactions of M3A with HPA. c. Predicted interactions of Pg3R with HPA in 2D dimension. d. Predicted interactions of M3A with HPA in 2D dimension.

**Figure S3**

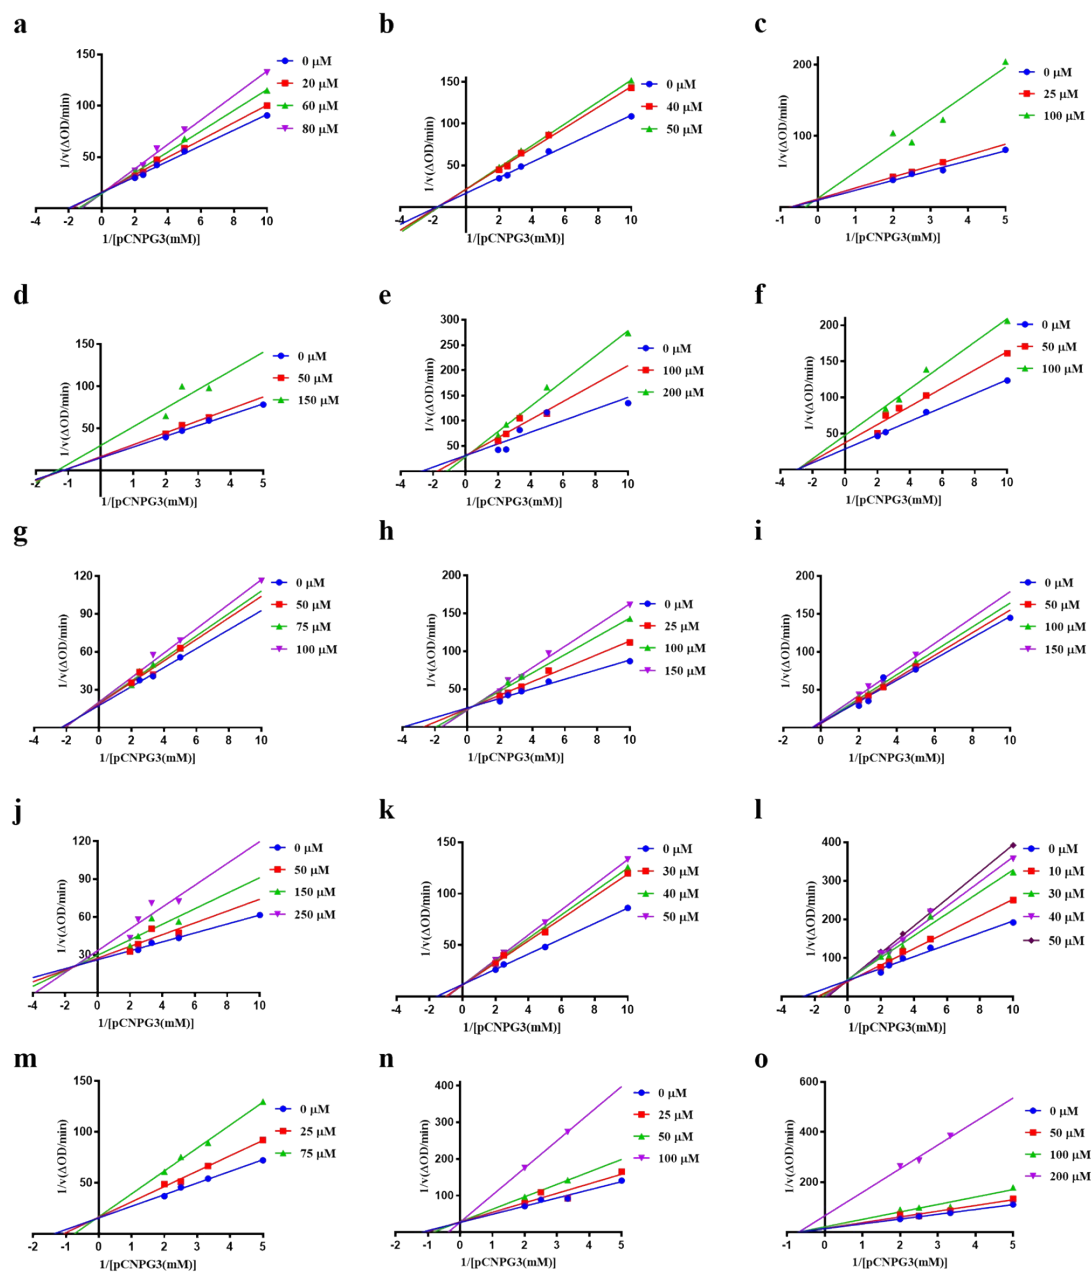

Enzyme kinetic results of 15 anthocyanins in Lineweaver-Burk plots. a. C3A. b. C3Ga. c. C3G. d. C3R. e. C3S. f. D3A. g. D3Ga. h. D3G. i. D3R. j. D3S. k. Pn3A. l. Pn3Ga. m. Pet3A. n. Pet3Ga. o. Pet3G.

**Figure S4**

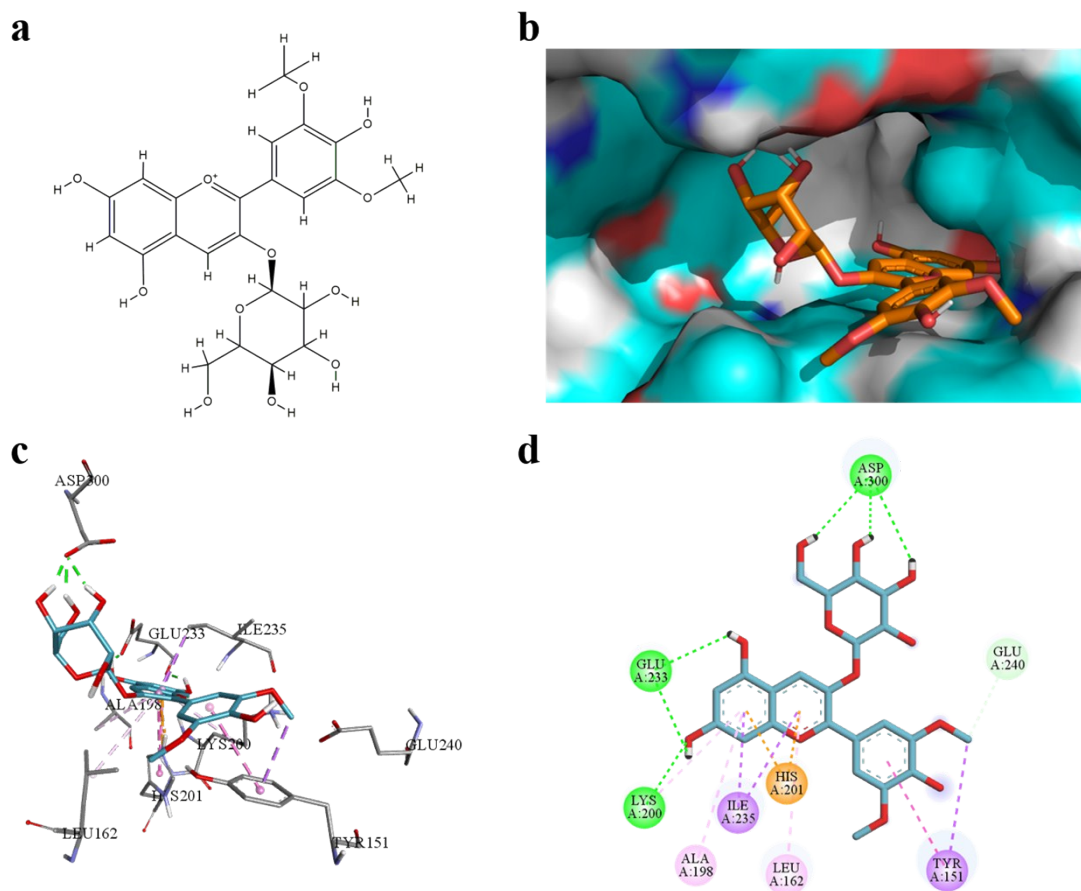

Molecular docking results of M3Ga with HPA. a. Chemical structure of M3Ga. b. Predicted binding conformation of M3Ga in the active pocket of HPA, M3Ga is colored in orange, and its oxygen atoms are colored in red. c. Predicted interactions of M3Ga with HPA d. Predicted interactions of M3Ga with HPA in 2D dimension. M3Ga is colored in cyan, and its oxygen atoms are colored in red. Hydrogen bonding interactions are colored in light green and green, hydrophobic interactions are colored in orange, light pink and purple.

**Figure S5**

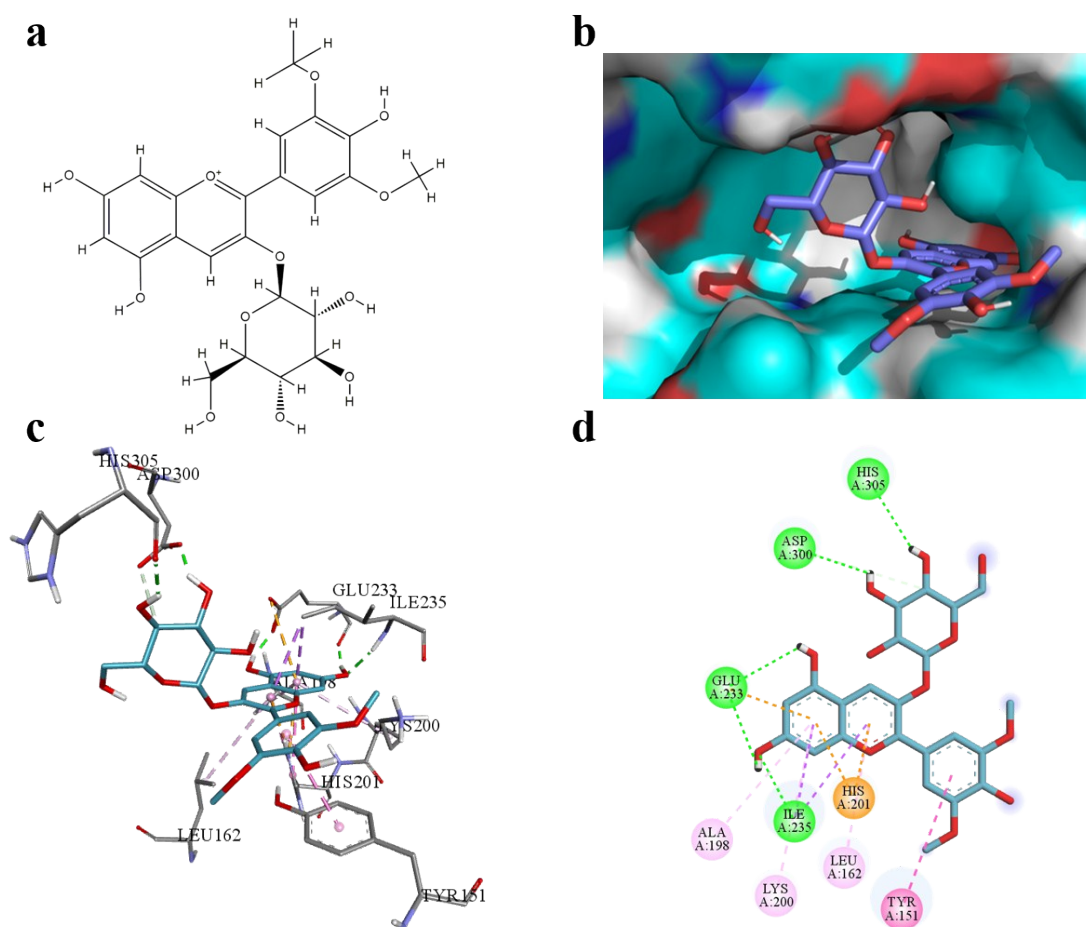

Molecular docking results of M3G with HPA. a. Chemical structure of M3G. b. Predicted binding conformation of M3G in the active pocket of HPA, M3G is colored in purple, and its oxygen atoms are colored in red. c. Predicted interactions of M3G with HPA d. Predicted interactions of M3G with HPA in 2D dimension. M3G is colored in cyan, and its oxygen atoms are colored in red. Hydrogen bonding interactions are colored in green, hydrophobic interactions are colored in orange, light pink and pink.

**Figure S6**

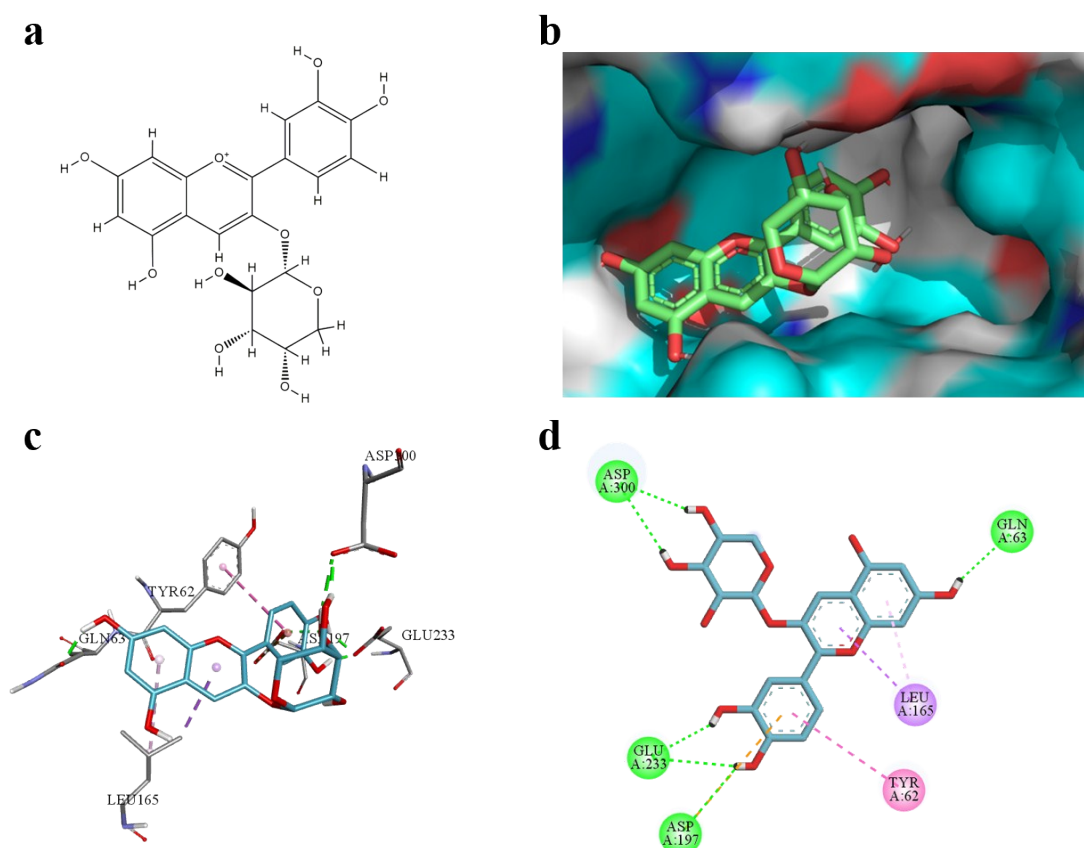

Molecular docking results of C3A with HPA. a. Chemical structure of C3A. b. Predicted binding conformation of C3A in the active pocket of HPA, C3A is colored in green, and its oxygen atoms are colored in red. c. Predicted interactions of C3A with HPA d. Predicted interactions of C3A with HPA in 2D dimension. C3A is colored in cyan, and its oxygen atoms are colored in red. Hydrogen bonding interactions are colored in green, hydrophobic interactions are colored in pink and purple.

**Figure S7**

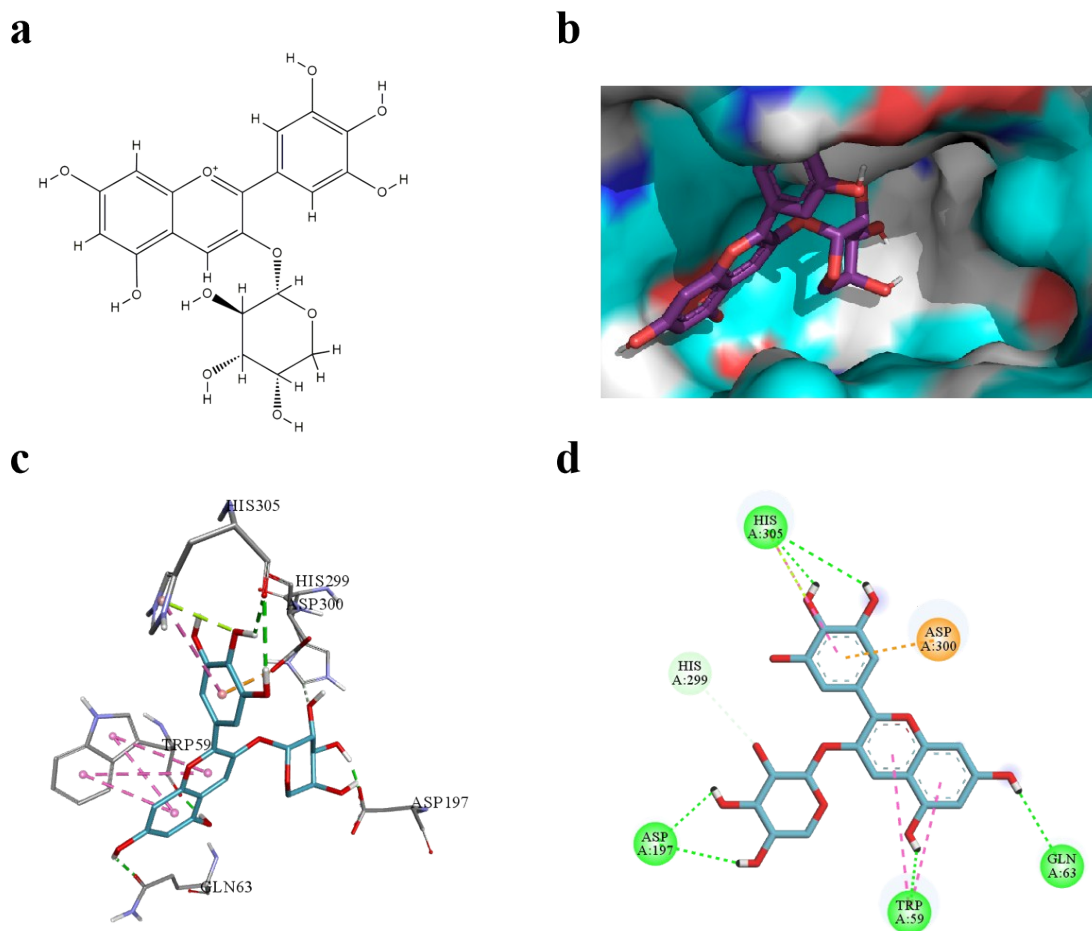

Molecular docking results of D3A with HPA. a. Chemical structure of D3A. b. Predicted binding conformation of D3A in the active pocket of HPA, D3A is colored in purple, and its oxygen atoms are colored in red. c. Predicted interactions of D3A with HPA d. Predicted interactions of D3A with HPA in 2D dimension. Pt3A is colored in cyan, and its oxygen atoms are colored in red. Hydrogen bonding interactions are colored in green, hydrophobic interactions are colored in pink and orange.



**Figure S8**

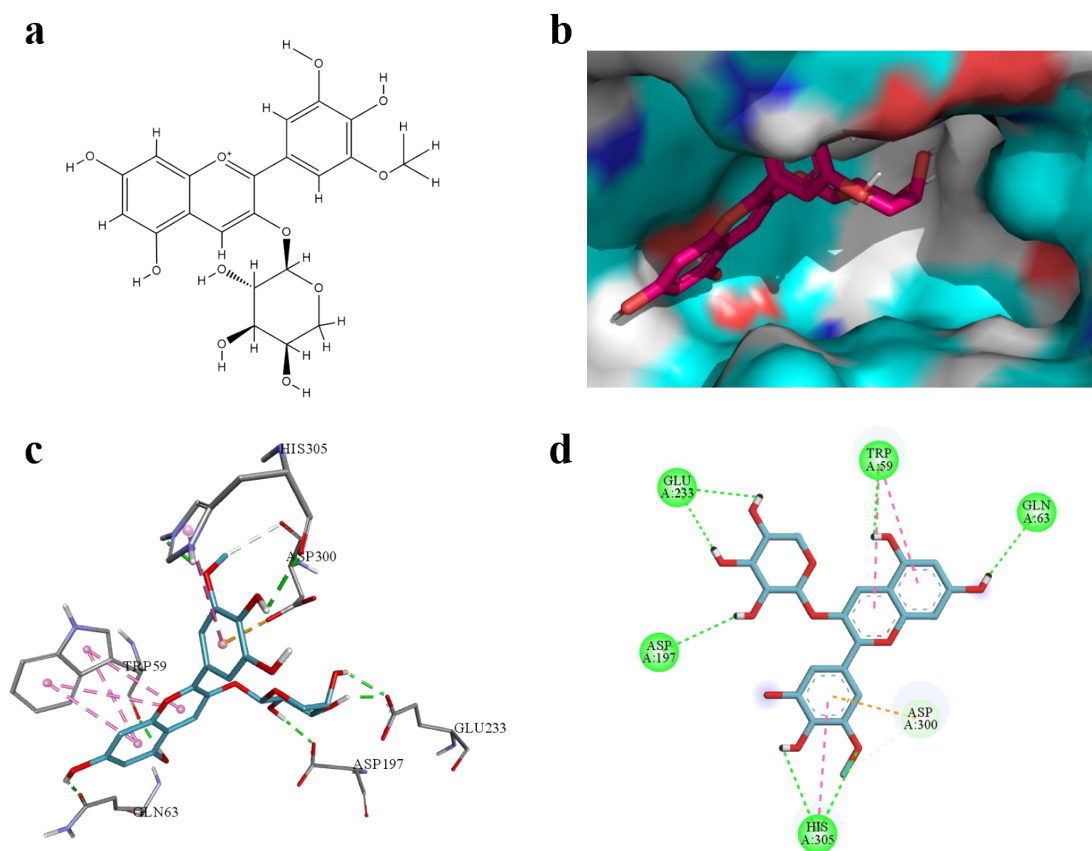

Molecular docking results of Pt3A with HPA. a. Chemical structure of Pt3A. b. Predicted binding conformation of Pt3A in the active pocket of HPA, Pt3A is colored in pink, and its oxygen atoms are colored in red. c. Predicted interactions of Pt3A with HPA d. Predicted interactions of Pt3A with HPA in 2D dimension. Pt3A is colored in cyan, and its oxygen atoms are colored in red. Hydrogen bonding interactions are colored in green, hydrophobic interactions are colored in pink and orange.

**Figure S9**

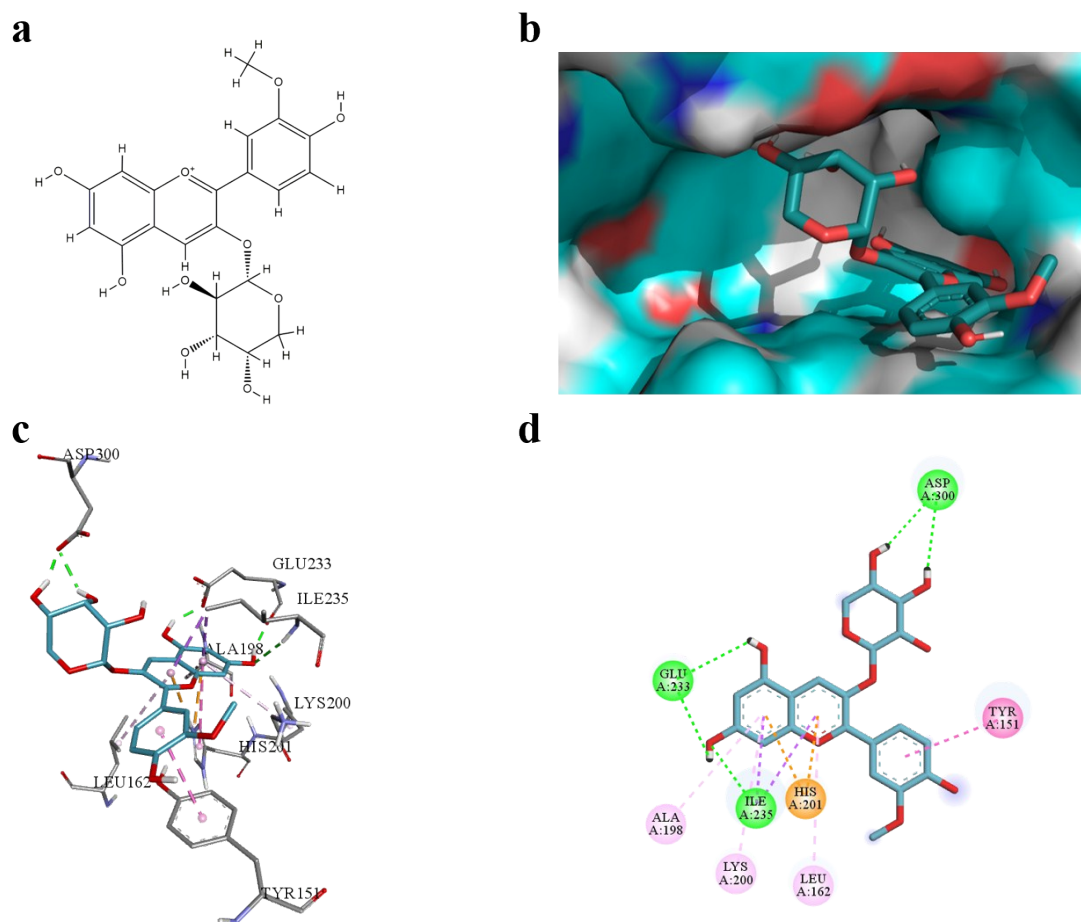

Molecular docking results of Pn3A with HPA. a. Chemical structure of Pn3A. b. Predicted binding conformation of Pn3A in the active pocket of HPA, Pn3A is colored in indigo, and its oxygen atoms are colored in red. c. Predicted interactions of Pn3A with HPA d. Predicted interactions of Pn3A with HPA in 2D dimension. Pn3A is colored in cyan, and its oxygen atoms are colored in red. Hydrogen bonding interactions are colored in green, hydrophobic interactions are colored in light pink and

**Figure S10**

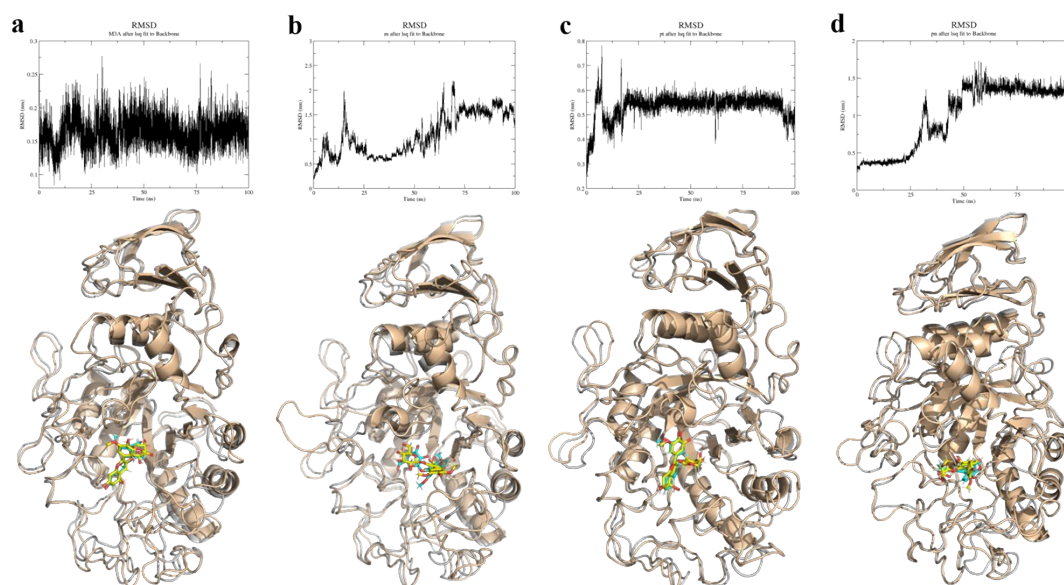

RMSD and conformation analysis of molecular dynamic results. Conformation of HPA before molecular dynamic simulation is colored in gray, conformation of HPA after molecular dynamic simulation is colored in wheat, conformation of anthocyanin before molecular dynamic simulation is colored in blue, and conformation of anthocyanin after molecular dynamic simulation is colored in yellow. a. M3A. b. M3G. c. Pt3A. d. Pn3A.
